# Supplementary material for: Low-Cost and Efficient Nickel Nitroprusside/Graphene Nanohybrid Electrocatalysts as Counter Electrodes for Dye-Sensitized Solar Cells
Source: MDPI journal article supplement (doi:10.3390/ma14216563), 2021-11-01
Supplement: s1 [file s1]

# Low-Cost and Efficient Nickel Nitroprusside/Graphene Nanohybrid Electrocatalysts as Counter Electrodes for Dye-Sensitized Solar Cells

Md. Mahbubur Rahman \*

Department of Applied Chemistry, Konkuk University, Chungju 27478, Republic of Korea;  
mahbub1982@kku.ac.kr

**Table S1.** Atomic parameters of NNP based on the XRD analysis by refinement, where O: oxygen of the NO group; O1: coordinated water; O2, O3, O4, O5: weakly bonded with water [S1].

| Atom            | Occ.  | x/a      | y/b      | z/c       |
|-----------------|-------|----------|----------|-----------|
| Fe              | 0.125 | 0.000000 | 0.000000 | 0.012000  |
| Ni              | 0.125 | 0.000000 | 0.000000 | 0.511500  |
| C <sub>eq</sub> | 0.5   | 0.000000 | 0.000000 | 0.189200  |
| C <sub>ax</sub> | 0.125 | 0.000000 | 0.000000 | -0.180100 |
| N <sub>eq</sub> | 0.5   | 0.000000 | 0.000000 | 0.302000  |
| N <sub>ax</sub> | 0.125 | 0.000000 | 0.000000 | 0.172400  |
| O               | 0.125 | 0.000000 | 0.000000 | 0.282600  |
| O1              | 0.5   | 0.000000 | 0.000000 | 0.299900  |
| O2              | 0.091 | 0.000000 | 0.000000 | 0.000000  |
| O3              | 0.115 | 0.199300 | 0.199300 | 0.199300  |
| O4              | 0.13  | 0.234900 | 0.234900 | 0.234900  |
| O5              | 0.148 | 0.000000 | 0.000000 | 0.259000  |

**Table S2.** Crystal structural parameters of NNP.

| Parameter                                    | Standard values <sup>a</sup> and formula                                                                                                                                                                                                      | (hkl)                   | Estimated values               |
|----------------------------------------------|-----------------------------------------------------------------------------------------------------------------------------------------------------------------------------------------------------------------------------------------------|-------------------------|--------------------------------|
| Crystallite size (D) (nm) Scherrer's formula | $D = \frac{K\lambda}{\beta \cos \theta}$ <p>where, K is a dimensionless shape factor (0.9), <math>\lambda</math> is the X-ray wavelength, <math>\beta</math> is the full width at half maxima, and <math>\theta</math> is the Bragg angle</p> |                         | 9.37, 8.61, 8.83, and 7.52     |
| d <sub>hkl</sub> (Å)                         | 5.09, 3.60, 2.54, and 2.80                                                                                                                                                                                                                    | (002), (022), and (004) | 5.02, 3.56, 2.53, and 2.26     |
| Diffraction peak 2 $\theta$ (degree)         | 17.404, 24.71, 35.2265, and 39.55                                                                                                                                                                                                             |                         | 17.65, 24.99, 35.40, and 39.85 |

<sup>a</sup>Standard values based on the computed results obtained from VESTA.

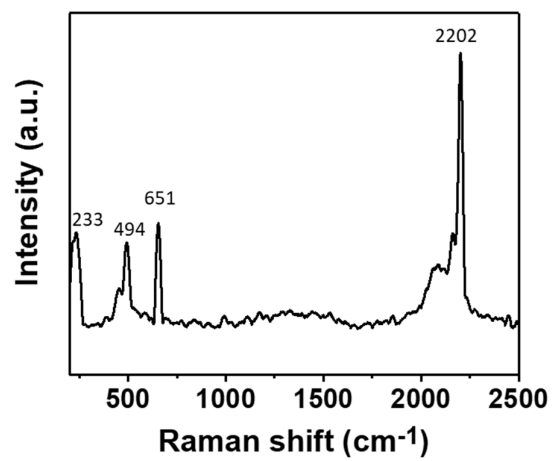

Figure S1. Raman spectra of NNP.

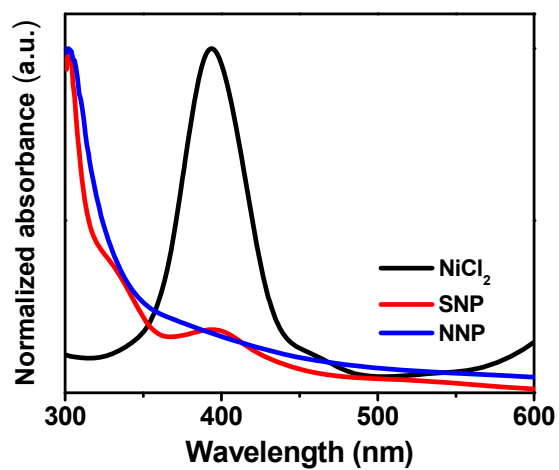

Figure S2. UV-Visible absorption spectra of NNP, SNP, and  $\text{NiCl}_2$ , measured after dispersing in ethanol by sonication.

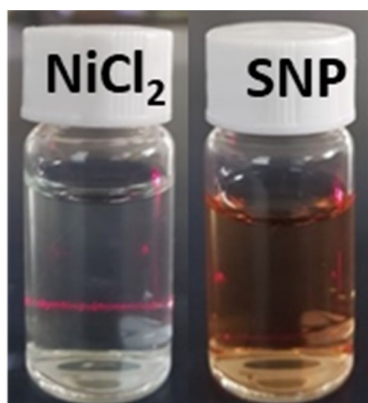

**Figure S3.** Photographic images of Tyndall light scattering experiments for SNP and NiCl<sub>2</sub>.

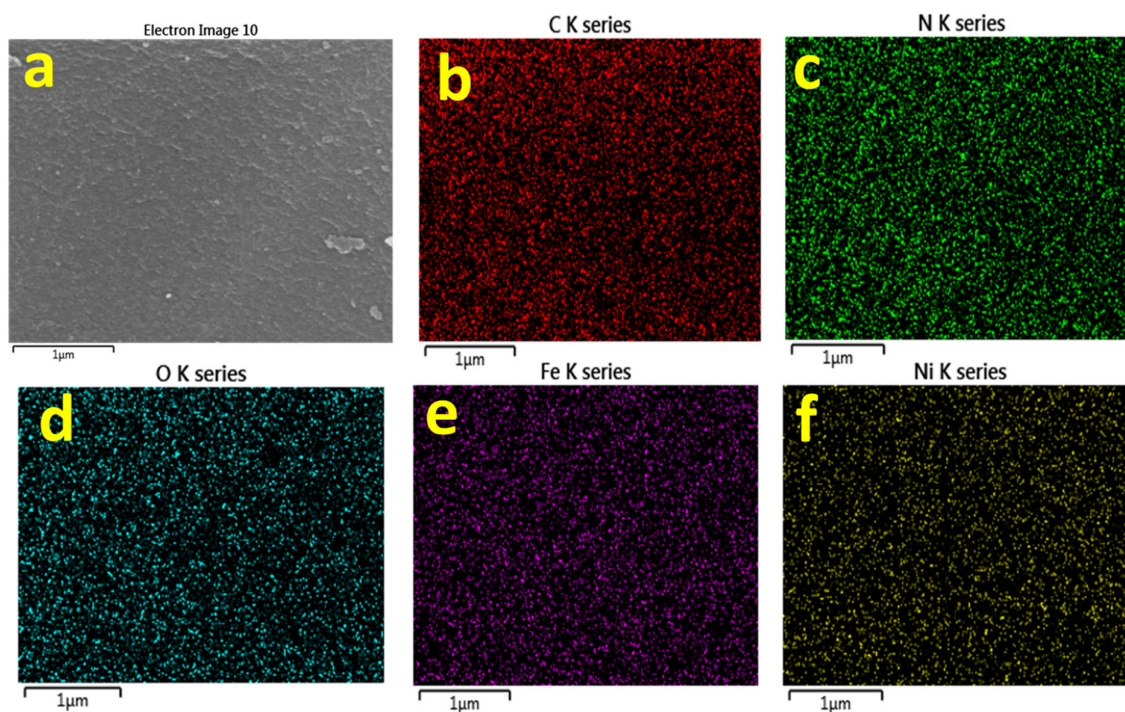

**Figure S4.** (a) FE-SEM image of the selected area and EDS elemental mapping of (b) C, (c) N, (d) O, (e) Fe, and (f) Ni in NNP.

**Table S3.** Values of binding energies of elements and functional groups in NNP.

| C 1s<br>peak<br>(eV) | N 1s<br>peak (eV) |            | O 1s<br>peak (eV) |                  | Fe <sup>2+</sup> 2p<br>peak (eV) |                                 |                                  |                                 | Ni <sup>2+</sup> 2p<br>peak (eV) |                   |
|----------------------|-------------------|------------|-------------------|------------------|----------------------------------|---------------------------------|----------------------------------|---------------------------------|----------------------------------|-------------------|
| C≡N                  | C≡N               | NO         | NO                | H <sub>2</sub> O | 2p <sub>3/2</sub> (high<br>spin) | 2p <sub>3/2</sub> (low<br>spin) | 2p <sub>1/2</sub> (high<br>spin) | 2p <sub>1/2</sub> (low<br>spin) | 2p <sub>3/2</sub>                | 2p <sub>1/2</sub> |
| 284.85               | 398.14<br>0       | 402.9<br>0 | 531.5<br>0        | 534.8<br>5       | 708.20                           | 710.60                          | 721.20                           | 723.60                          | 855.1<br>5                       | 872.3<br>0        |

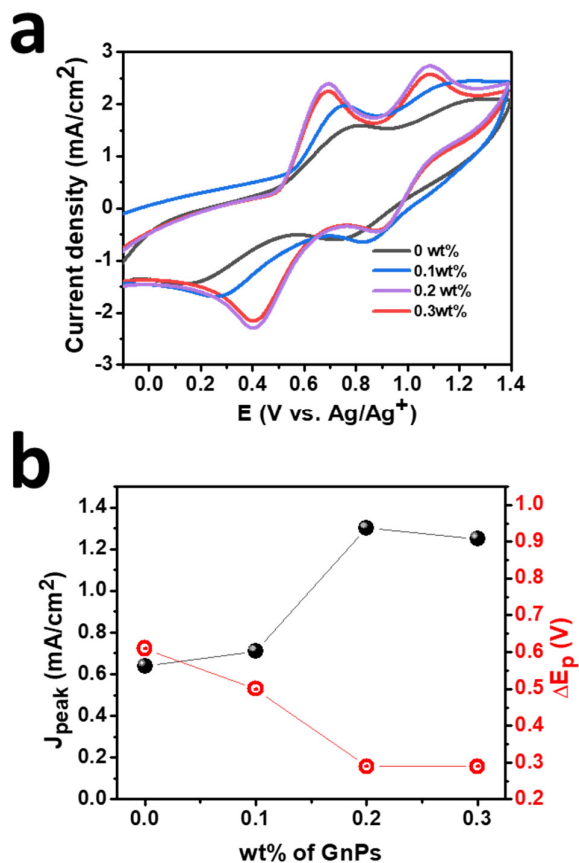

**Figure S5.** (a) CVs of I<sup>−</sup>/I<sub>3</sub><sup>−</sup> electrolyte at NNP/GnP/FTO electrodes (scan rate: 100 mV/s) with different wt% of GnP. (b) Variation of the  $J_{peak}$  and  $\Delta E_p$  against the wt% of GnP for the redox reaction of I<sup>−</sup>/I<sub>3</sub><sup>−</sup> electrolyte.

### 1. Fabrication of symmetrical dummy cell

Symmetrical dummy cells were fabricated with two identical NNP-, GnP-, Pt-, and NNP/GnP-FTO electrodes, separated by 60- $\mu\text{m}$  thick Surlyn (Solaronix, Switzerland) film as the spacing and sealing materials (Figure S6a). The active area of all the dummy cells was about 0.40  $\text{cm}^2$ . The  $\text{I}^-/\text{I}_3^-$  electrolyte solution was injected into the cells through a hole in the CEs. The hole was sealed by using scotch tape.

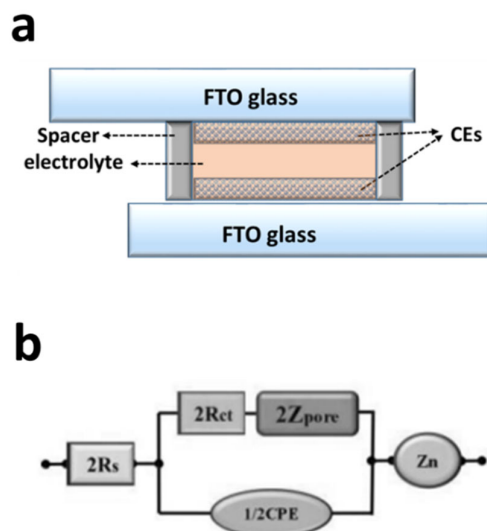

**Figure S6.** (a) Schematic of the structure of symmetrical dummy cells and (b) equivalent circuit to fit the EIS spectra.

### 2. Calculation of exchange current density ( $J_0$ )

The  $J_0$  for all the CEs was determined according to the following equation S1.

$$J_0 = \frac{RT}{nFR_{ct}} \quad (S1)$$

where,  $R$  is the gas constant,  $T$  is the absolute temperature,  $n$  is the number of electrons,  $F$  is the Faraday constant, and  $R_{ct}$  is the charge transfer resistance obtained from the EIS spectra of symmetrical dummy cells.

### 3. Calculation of Diffusion coefficient ( $D_n$ )

The  $D_n$  for all the CEs was determined according to the following equation S2.

$$D_n = \frac{l j_{lim}}{2nFC} \quad (S2)$$

where,  $l$  is the distance between electrodes in a symmetric dummy cell,  $C$  is the concentration of  $\text{I}^-/\text{I}_3^-$  electrolyte,  $n$  ( $\approx 2$ ) is the number of electrons involved in the  $\text{I}_3^-$  reduction, and  $F$  is the Faraday constant.

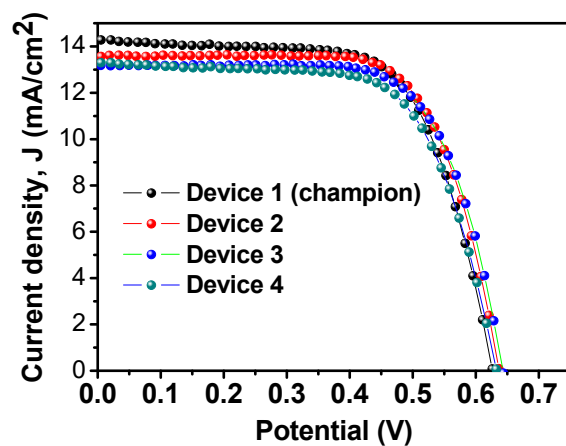

**Figure S7.** Photocurrent density ( $J$ )-voltage ( $V$ ) plot of four DSSCs devices based on NNP/GnP hybrid CEs.

**Table S4.**  $J$ - $V$  parameters of four DSSCs devices based on NNP/GnP hybrid CEs.

| DSSCs               | $J_{sc}$ (mA/cm <sup>2</sup> ) | $V_{oc}$ (V) | $FF$ (%) | PCE (%) |
|---------------------|--------------------------------|--------------|----------|---------|
| Device 1 (champion) | 14.22                          | 0.628        | 68.68    | 6.13    |
| Device 2            | 13.63                          | 0.642        | 68.95    | 6.03    |
| Device 3            | 13.35                          | 0.645        | 68.95    | 5.93    |
| Device 4            | 13.23                          | 0.640        | 68.85    | 5.83    |

**Table S5.** PV parameters of DSSCs, mediated by  $I^-/I_3^-$  electrolyte, and based on the reported Ni and its compounds-based composite CEs, together with the present NNP/GnP-CE.

| CEs                                 | Methods for CE preparation     | Methods for TiO <sub>2</sub> photoanode preparation | TiO <sub>2</sub> scattering layer | $J_{sc}$ (mA/cm <sup>2</sup> ) | $V_{oc}$ (V) | FF (%) | PCE (%) | PCE compared to Pt-CE | Ref.      |
|-------------------------------------|--------------------------------|-----------------------------------------------------|-----------------------------------|--------------------------------|--------------|--------|---------|-----------------------|-----------|
| NiS/PEDOT: PSS                      | DB                             | SP                                                  | Yes                               | 16.05                          | 0.76         | 67     | 8.18    | 5.38% lower           | S2        |
| Ni/graphene nanoplatelets           | Electrodeposition/spin coating | SP                                                  | Yes                               | 15.85                          | 0.76         | 60.05  | 7.24    | 10.35% lower          | S3        |
| NiO/PEDOT-PSS                       | DB                             | DB                                                  | No                                | 22                             | 0.748        | 46     | 7.58    | 14.80% lower          | S4        |
| Ni-CNT-CNF                          | DB                             | DB                                                  | Yes                               | 15.83                          | 0.80         | 63     | 7.96    | 4.52% lower           | S5        |
| Ni-polyaniline-graphene             | Spin coating                   | SP                                                  | Yes                               | 13.43                          | 0.745        | 58     | 5.80    | 8.62% higher          | S6        |
| Ni <sub>1-x</sub> Mo <sub>x</sub> S | Electrodeposition              | DB                                                  | No                                | 17.21                          | 0.65         | 64     | 7.15    | 0.70% lower           | S7        |
| Ni <sub>0.85</sub> Se/rGO           | Spin coating                   | DB                                                  | Yes                               | 19.94                          | 0.751        | 65.2   | 9.75    | 8.82% higher          | S8        |
| NiS/acetylene black                 | Electrodeposition              | DB                                                  | No                                | 14.01                          | 0.72         | 67     | 6.75    | 6.66% lower           | S9        |
| NiO/graphene                        | Drop cast and PLD              | DB                                                  | No                                | 8.04                           | 0.71         | 63     | 3.06    | 16.66% lower          | S10       |
| Ni/graphene like carbon             | HFCVD                          | DB                                                  | No                                | 10.03                          | 0.663        | 45     | 3.1     | 90.3% lower           | S11       |
| Ni-NPs/PEDOT: PSS                   | DB                             | DB                                                  | Yes                               | 15.56                          | 0.74         | 68     | 7.81    | 2.30% higher          | S12       |
| Ni-NPs                              | DB                             |                                                     |                                   | 4.19                           | 0.67         | 8      | 0.24    | 3080% lower           |           |
| NiO@NiS@graphene                    | Spray coating                  | Spray coating                                       | No                                | 4.86                           | 0.76         | 56     | 2.10    | 31.90% lower          | S13       |
| Graphene/CNFs-Ni                    | Electrospinning                | DB                                                  | Yes                               | 14.31                          | 0.84         | 60     | 7.14    | 5.92% lower           | S14       |
| NNP/GnP                             | DB                             | SP                                                  | No                                | 14.22                          | 0.628        | 68.68  | 6.13    | 3.90% lower           | This work |

Note: CNT = carbon nanotube, CNF = carbon nanofiber, NF = nanofiber, rGO = reduced graphene oxide, NPs = nanoparticles, SP = Screen printing, DB = doctor blade, HFCVD = hot filament chemical vapor deposition, PLD = pulsed laser deposition.

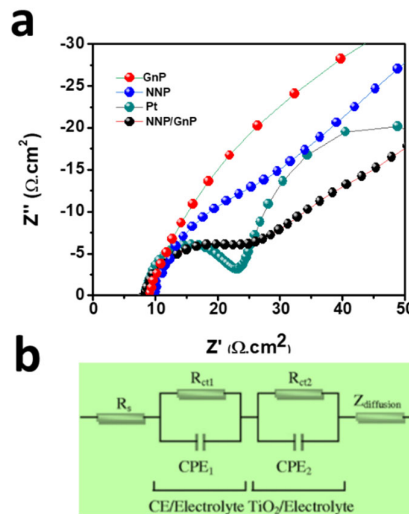

**Figure S8.** (a) Nyquist plots (high frequency region) of DSSCs based of different CEs and (b) equivalent circuit model to fit the plots.

## References

- S1. Gómez, A.; Rodríguez-Hernández, J.; Reguera, E. Crystal structures of cubic nitroprussides:  $M[Fe(CN)_5NO] \cdot xH_2O$  ( $M = Fe, Co, Ni$ ). Obtaining structural information from the background, *Powder Diffr.* **2007**, *22*, 27-34.
- S2. Maiaugree, W.; Pimparue, P.; Jarernboon, W.; Pimanpang, S.; Amornkitbamrung, V.; Swatsitang, E. NiS(NPs)-PEDOT-PSS composite counter electrode for a high efficiency dye sensitized solar cell, *Mater. Sci. Eng. B* **2017**, *220*, 66-72.
- S3. Ge, C.; Rahman, M. M.; Lee, J.-J. Graphene Nanoplatelets–Nickel Nanoparticles Hybrid Counter Electrodes for Low-Cost and Efficient Dye-Sensitized Solar Cells, *ECS J. Solid State Sci. Technol.* **2021**, *10*, 055001.
- S4. Wang, H.; Wei, W.; Hu, Y. H. NiO as an Efficient Counter Electrode Catalyst for Dye-Sensitized Solar Cells, *Top Catal.* **2014**, *57*, 607–611.
- S5. Joshi, P.; Zhou, Z.; Poudel, P.; Thapa, A.; Wu, X.-F.; Qiao, Q. Nickel incorporated carbon nanotube/nanofiber composites as counter electrodes for dye-sensitized solar cells, *Nanoscale* **2012**, *4*, 5659-5664.
- S6. Chen, X.; Liu, J.; Qian, K.; Wang, J. Ternary composites of Ni–polyaniline–graphene as counter electrodes for dye-sensitized solar cells, *RSC Adv.* **2017**, *8*, 10948-10953.
- S7. Theerthagiri, J.; Senthil, R. A.; Buraidah, M. H.; Madhavan, J.; Arof, A. K.; Ashokkumar, M. One-step electrochemical deposition of  $Ni_{1-x}Mo_xS$  ternary sulfides as an efficient counter electrode for dye-sensitized solar cells, *J. Mater. Chem. A* **2016**, *4*, 16119-16127.
- S8. Dong, J.; Wu, J.; Jia, J.; Fan, L.; Lin, J. Nickel selenide/reduced graphene oxide nanocomposite as counter electrode for high efficient dye-sensitized solar cells, *J. Colloid Interface Sci.* **2017**, *498*, 217-222.
- S9. Theerthagiri, J.; Senthil, R. A.; Arunachalam, P.; Bhabu, K. A.; Selvi, A.; Madhavan, J.; Murugan, K.; Arof, A. K. Electrochemical deposition of carbon materials incorporated nickel sulfide composite as counter electrode for dye-sensitized solar cells, *Ionics* **2017**, *23*, 1017-1025.
- S10. Bajpai, R.; Roy, S.; Koratkar, N.; Misra, D. S. NiO nanoparticles deposited on graphene platelets as a cost-effective counter electrode in a dye sensitized solar cell, *Carbon* **2013**, *56*, 56-63.
- S11. Song, M. W.; Ameen, S. A.; Akhtar, M. S.; Seo, H. K.; Shin, H. S. HFCVD grown graphene like carbon–nickel nanocomposite thin film as effective counter electrode for dye sensitized solar cells, *Mater. Res. Bull.* **2013**, *48*, 4538-4543.
- S12. Changa, L.-Y.; Li, Y.-Y.; Li, C.-T.; Lee, C.-P.; Fan, M.-S.; Vittal, R.; Hoa, K.-C.; Lin, J.-J. A composite catalytic film of Ni-NPs/PE-DOT: PSS for the counter electrodes in dye-sensitized solar cells, *Electrochim. Acta* **2014**, *146*, 697–705.
- S13. Silambarasan, K.; Archana, J.; Athithya, S.; Harish, S.; Ganesh, R. S.; Navaneethan, M.; Ponnusamy, S.; Muthamizhchelvan, C.; Hara, K.; Hayakawa, Y. Hierarchical NiO@NiS@graphene nanocomposite as a sustainable counter electrode for Pt free dye-sensitized solar cell, *Appl. Surf. Sci.* **2020**, *501*, 144010.
- S14. Zhou, Z.; Sigdel, S.; Gong, J.; Vaagensmith, B.; Elbohy, H.; Yang, H.; Krishnan, S.; Wu, X.-F.; Qiao, Q. Graphene-beaded carbon nanofibers with incorporated Ni nanoparticles as efficient counter-electrode for dye-sensitized solar cells, *Nano Energy* **2016**, *22*, 558–563.
